# Supplementary material for: Deep Features from Pretrained Networks Do Not Outperform Hand-Crafted Features in Radiomics
Source: MDPI journal article supplement (doi:10.3390/diagnostics13203266), 2023-10-20
Supplement: s1 [file s1]

## Supplemental Material

**Table S1.** List of pretrained deep networks used.

| Modelname                                       | Pretraining data | Number of parameters | Size of feature vector |
|-------------------------------------------------|------------------|----------------------|------------------------|
| radimagenet.resnet50                            | Medical data     | 23,59                | 2048                   |
| radimagenet.densenet121                         | Medical data     | 7,04                 | 1024                   |
| radimagenet.inceptionV3                         | Medical data     | 21,8                 | 2048                   |
| radimagenet.IRV2                                | Medical data     | 54,33                | 1536                   |
| medicalimagenet.resnet10                        | Medical data     | 14,36                | 512                    |
| medicalimagenet.resnet18                        | Medical data     | 32,99                | 512                    |
| medicalimagenet.resnet34                        | Medical data     | 63,3                 | 512                    |
| medicalimagenet.resnet50                        | Medical data     | 46,16                | 2048                   |
| convnext-v2-large_fcmae-in21k-pre_3rdparty_in1k | ImageNet-1K      | 197,96               | 1536                   |
| deit3-huge-p14_in21k-pre_3rdparty_in1k          | ImageNet-1K      | 632,13               | 1280                   |
| efficientnet-b7_3rdparty-ra-noisystudent_in1k   | ImageNet-1K      | 66,35                | 80                     |
| efficientnetv2-l_in21k-pre_3rdparty_in1k        | ImageNet-1K      | 118,52               | 96                     |
| simclr_resnet50_16xb256-coslr-200e_in1k         | Self-supervised  | 27,97                | 2048                   |
| simclr_resnet50_8xb32-coslr-200e_in1k           | Self-supervised  | 38,2                 | 2048                   |
| mocov3_resnet50_8xb512-amp-coslr-300e_in1k      | Self-supervised  | 68,01                | 2048                   |
| barlowtwins_resnet50_8xb256-coslr-300e_in1k     | Self-supervised  | 174,54               | 2048                   |
| resnet34_8xb32_in1k                             | ImageNet-1K      | 2,18                 | 512                    |
| vgg16bn_8xb32_in1k                              | ImageNet-1K      | 138,37               | 1000                   |
| densenet161_3rdparty_in1k                       | ImageNet-1K      | 28,68                | 2208                   |
| efficientnet-b2_3rdparty_8xb32_in1k             | ImageNet-1K      | 9,11                 | 48                     |

Table S2. AUC of the models using hand-crafted features.

| Model                       | C4KC-KiTS    | CRLM        | Des-moid     | GBM          | GIST         | HN           | I-SPY1       | Lipo         | Liver        | Mela-noma    | Mean AUC | $\Delta$ AUC |
|-----------------------------|--------------|-------------|--------------|--------------|--------------|--------------|--------------|--------------|--------------|--------------|----------|--------------|
| Hand-crafted, 2-D, All      | 0.761        | <b>0.79</b> | 0.899        | 0.722        | 0.817        | 0.902        | 0.68         | 0.883        | 0.801        | 0.681        | 0.794    | 0.005        |
| Hand-crafted, 2-D, No morph | 0.756        | 0.778       | 0.891        | 0.741        | <b>0.819</b> | 0.902        | 0.68         | <b>0.885</b> | <b>0.803</b> | 0.681        | 0.793    | 0.005        |
| Hand-crafted, 3-D, No morph | <b>0.768</b> | 0.749       | 0.898        | 0.772        | 0.764        | <b>0.914</b> | 0.671        | 0.876        | 0.782        | <b>0.719</b> | 0.791    | 0.002        |
| Hand-crafted, 3-D, All      | <b>0.768</b> | 0.749       | <b>0.908</b> | <b>0.783</b> | 0.78         | 0.903        | 0.671        | 0.883        | 0.774        | 0.669        | 0.789    | 0            |
| Hand-crafted, 3-D, Morph    | 0.58         | 0.742       | 0.807        | 0.694        | 0.726        | 0.849        | <b>0.681</b> | 0.884        | 0.676        | 0.589        | 0.723    | -0.066       |

Models with “All” used all available hand-crafted features, while those with “No morph” used all but morphological features. The models with “Morph” used only morphological features.  $\Delta$ AUC denotes the mean difference to the standard “Hand-crafted, 3-D, All” model. Models with the highest AUC for each dataset were marked in bold.

Table S3. AUC of the models using deep features.

| Model                           | C4KC-KiTS    | CRLM         | Des-moid     | GBM          | GIST         | HN           | I-SPY1       | Lipo         | Liver        | Melanoma     | Mean AUC | $\Delta$ AUC |
|---------------------------------|--------------|--------------|--------------|--------------|--------------|--------------|--------------|--------------|--------------|--------------|----------|--------------|
| ConvNeXt V2, large              | 0.661        | <b>0.821</b> | <b>0.881</b> | 0.781        | 0.742        | 0.902        | 0.661        | <b>0.886</b> | 0.793        | 0.623        | 0.775    | -0.014       |
| SimSiam, ResNet-50              | 0.664        | 0.671        | 0.829        | <b>0.915</b> | 0.689        | 0.911        | 0.732        | 0.846        | 0.794        | 0.614        | 0.766    | -0.022       |
| SimCLR, ResNet-50               | 0.682        | 0.714        | 0.859        | 0.772        | 0.701        | 0.908        | 0.688        | 0.822        | <b>0.819</b> | 0.649        | 0.761    | -0.027       |
| DenseNet-161                    | 0.675        | 0.676        | 0.867        | 0.709        | <b>0.757</b> | 0.89         | 0.688        | 0.843        | 0.778        | 0.666        | 0.755    | -0.034       |
| ResNet-34                       | <b>0.711</b> | 0.743        | 0.845        | 0.645        | 0.738        | 0.874        | 0.652        | 0.885        | 0.816        | 0.607        | 0.752    | -0.037       |
| VGG-16                          | 0.625        | 0.667        | 0.872        | 0.725        | 0.703        | 0.85         | 0.68         | 0.857        | 0.786        | 0.742        | 0.751    | -0.038       |
| BarlowTwins, ResNet-50          | 0.692        | 0.672        | 0.82         | 0.726        | 0.697        | 0.896        | 0.755        | 0.826        | 0.786        | 0.631        | 0.75     | -0.039       |
| DeiT III huge                   | 0.646        | 0.689        | 0.761        | 0.785        | 0.738        | 0.864        | <b>0.788</b> | 0.871        | 0.702        | 0.644        | 0.749    | -0.04        |
| EfficientNet-B2                 | 0.657        | 0.705        | 0.788        | 0.734        | 0.711        | 0.831        | 0.765        | 0.821        | 0.773        | 0.654        | 0.744    | -0.045       |
| MoCo V3, ResNet-50              | 0.67         | 0.734        | 0.872        | 0.651        | 0.685        | <b>0.913</b> | 0.674        | 0.827        | 0.779        | 0.6          | 0.74     | -0.048       |
| EfficientNet-B7                 | 0.664        | 0.722        | 0.818        | 0.678        | 0.687        | 0.886        | 0.669        | 0.835        | 0.703        | 0.694        | 0.736    | -0.053       |
| EfficientNet V2, large          | 0.671        | 0.668        | 0.816        | 0.725        | 0.706        | 0.856        | 0.707        | 0.762        | 0.749        | 0.656        | 0.732    | -0.057       |
| MedicalNet, ResNet-10           | 0.688        | 0.652        | 0.749        | 0.819        | 0.736        | 0.812        | 0.645        | 0.758        | 0.726        | 0.712        | 0.73     | -0.059       |
| MedicalNet, ResNet-50           | 0.712        | 0.59         | 0.721        | 0.803        | 0.697        | 0.816        | 0.647        | 0.693        | 0.737        | <b>0.775</b> | 0.719    | -0.07        |
| RadImageNet, InceptionResNet-V2 | 0.61         | 0.669        | 0.743        | 0.756        | 0.689        | 0.744        | 0.663        | 0.743        | 0.645        | <b>0.775</b> | 0.704    | -0.085       |
| RadImageNet, DenseNet-121       | 0.61         | 0.684        | 0.746        | 0.699        | 0.706        | 0.751        | 0.707        | 0.778        | 0.719        | 0.599        | 0.7      | -0.089       |
| MedicalNet, ResNet-18           | 0.679        | 0.565        | 0.756        | 0.726        | 0.664        | 0.823        | 0.65         | 0.735        | 0.719        | 0.677        | 0.7      | -0.089       |
| RadImageNet, Inception-V3       | 0.599        | 0.642        | 0.774        | 0.781        | 0.669        | 0.78         | 0.638        | 0.75         | 0.688        | 0.576        | 0.69     | -0.099       |
| MedicalNet, ResNet-34           | 0.7          | 0.569        | 0.736        | 0.724        | 0.67         | 0.778        | 0.645        | 0.743        | 0.667        | 0.648        | 0.688    | -0.101       |
| RadImageNet, ResNet-50          | 0.642        | 0.715        | 0.691        | 0.766        | 0.676        | 0.714        | 0.688        | 0.702        | 0.598        | 0.662        | 0.685    | -0.103       |

$\Delta$ AUC denotes the mean difference to the standard “Hand-crafted, 3-D, All” model. Models with the highest AUC for each dataset were marked in bold.

Table S4. AUC of the models using deep features fused with morphological features.

| Model                            | C4KC-KiTS    | CRLM         | Des-moid     | GBM          | GIST         | HN           | I-SPY1       | Lipo         | Liver        | Mela-noma    | Mean AUC | $\Delta$ AUC |
|----------------------------------|--------------|--------------|--------------|--------------|--------------|--------------|--------------|--------------|--------------|--------------|----------|--------------|
| ConvNeXt V2, large               | 0.661        | <b>0.792</b> | <b>0.882</b> | 0.801        | 0.746        | 0.902        | 0.674        | 0.884        | <b>0.818</b> | 0.618        | 0.778    | -0.011       |
| SimSiam, ResNet-50               | 0.699        | 0.671        | 0.851        | <b>0.915</b> | 0.675        | 0.902        | 0.732        | 0.884        | 0.793        | 0.644        | 0.777    | -0.012       |
| EfficientNet-B2                  | 0.652        | 0.794        | 0.847        | 0.839        | 0.717        | 0.864        | 0.71         | 0.884        | 0.758        | 0.665        | 0.773    | -0.016       |
| SimCLR, ResNet-50                | 0.682        | 0.703        | 0.872        | 0.768        | 0.722        | 0.91         | 0.698        | 0.884        | 0.807        | 0.611        | 0.766    | -0.023       |
| DenseNet-161                     | 0.675        | 0.684        | 0.867        | 0.731        | <b>0.758</b> | 0.896        | 0.688        | 0.884        | 0.778        | 0.67         | 0.763    | -0.026       |
| BarlowTwins, ResNet-50           | 0.692        | 0.68         | 0.855        | 0.726        | 0.707        | 0.904        | 0.744        | 0.884        | 0.782        | 0.628        | 0.76     | -0.029       |
| VGG-16                           | 0.628        | 0.688        | 0.877        | 0.784        | 0.712        | 0.847        | 0.64         | 0.884        | 0.795        | 0.723        | 0.758    | -0.031       |
| EfficientNet V2, large           | 0.673        | 0.715        | 0.842        | 0.735        | 0.726        | 0.861        | 0.715        | 0.884        | 0.76         | 0.659        | 0.757    | -0.032       |
| ResNet-34                        | <b>0.715</b> | 0.717        | 0.855        | 0.708        | 0.747        | 0.868        | 0.65         | 0.896        | 0.817        | 0.581        | 0.755    | -0.033       |
| DeiT III huge                    | 0.646        | 0.71         | 0.773        | 0.798        | 0.741        | 0.865        | <b>0.781</b> | <b>0.918</b> | 0.678        | 0.644        | 0.755    | -0.034       |
| MedicalNet, ResNet-50            | 0.712        | 0.669        | 0.784        | 0.803        | 0.686        | 0.845        | 0.612        | 0.884        | 0.756        | <b>0.776</b> | 0.753    | -0.036       |
| EfficientNet-B7                  | 0.664        | 0.742        | 0.842        | 0.714        | 0.725        | 0.875        | 0.663        | 0.884        | 0.713        | 0.695        | 0.752    | -0.037       |
| MedicalNet, ResNet-10            | 0.687        | 0.686        | 0.795        | 0.821        | 0.722        | 0.849        | 0.649        | 0.884        | 0.749        | 0.669        | 0.751    | -0.038       |
| MoCo V3, ResNet-50               | 0.67         | 0.72         | 0.876        | 0.651        | 0.699        | <b>0.913</b> | 0.681        | 0.884        | 0.779        | 0.618        | 0.749    | -0.04        |
| RadImageNet, ResNet-50           | 0.652        | 0.758        | 0.777        | 0.759        | 0.7          | 0.849        | 0.708        | 0.884        | 0.651        | 0.675        | 0.741    | -0.048       |
| RadImageNet, InceptionRes-Net-V2 | 0.666        | 0.66         | 0.781        | 0.752        | 0.706        | 0.841        | 0.673        | 0.888        | 0.654        | 0.775        | 0.74     | -0.049       |
| MedicalNet, ResNet-18            | 0.688        | 0.649        | 0.835        | 0.755        | 0.686        | 0.843        | 0.636        | 0.884        | 0.73         | 0.677        | 0.738    | -0.051       |
| MedicalNet, ResNet-34            | 0.7          | 0.633        | 0.818        | 0.738        | 0.697        | 0.849        | 0.644        | 0.884        | 0.727        | 0.648        | 0.734    | -0.055       |
| RadImageNet, DenseNet-121        | 0.602        | 0.685        | 0.77         | 0.689        | 0.748        | 0.836        | 0.664        | 0.887        | 0.709        | 0.606        | 0.72     | -0.069       |
| RadImageNet, Inception-V3        | 0.58         | 0.674        | 0.8          | 0.788        | 0.682        | 0.856        | 0.616        | 0.884        | 0.662        | 0.542        | 0.708    | -0.08        |

$\Delta$ AUC denotes the mean difference to the standard “Hand-crafted, 3-D, All” model. Models with the highest AUC for each dataset were marked in bold.

Table S5. AUC of the models using deep features fused with hand-crafted features.

| ModelName                        | C4KC-KiTS    | CRLM         | Des-moid     | GBM          | GIST         | HN           | I-SPY1       | Lipo         | Liver        | Mela-noma    | Mean AUC | ΔAUC   |
|----------------------------------|--------------|--------------|--------------|--------------|--------------|--------------|--------------|--------------|--------------|--------------|----------|--------|
| SimSiam, ResNet-50               | 0.74         | 0.711        | 0.868        | <b>0.915</b> | 0.768        | 0.904        | <b>0.704</b> | <b>0.933</b> | 0.794        | 0.647        | 0.798    | 0.009  |
| EfficientNet V2, large           | 0.772        | 0.738        | <b>0.925</b> | 0.764        | 0.777        | 0.905        | 0.701        | 0.885        | 0.787        | 0.693        | 0.795    | 0.006  |
| EfficientNet-B2                  | 0.768        | 0.76         | 0.911        | 0.779        | 0.77         | 0.909        | 0.655        | 0.87         | 0.8          | 0.723        | 0.795    | 0.006  |
| MedicalNet, ResNet10             | 0.754        | 0.749        | 0.891        | 0.819        | 0.78         | 0.896        | 0.649        | 0.873        | 0.779        | 0.73         | 0.792    | 0.003  |
| DeiT III huge                    | 0.759        | 0.753        | 0.852        | 0.754        | <b>0.815</b> | 0.882        | 0.701        | 0.884        | 0.788        | 0.718        | 0.791    | 0.002  |
| EfficientNet-B7                  | 0.771        | 0.772        | 0.923        | 0.754        | 0.762        | 0.906        | 0.676        | 0.873        | 0.768        | 0.699        | 0.79     | 0.001  |
| SimCLR, ResNet-50                | <b>0.794</b> | 0.77         | 0.896        | 0.739        | 0.77         | <b>0.911</b> | 0.677        | 0.885        | 0.787        | 0.652        | 0.788    | -0.001 |
| RadImageNet, ResNet50            | 0.758        | 0.744        | 0.87         | 0.795        | 0.767        | 0.899        | 0.686        | 0.889        | 0.774        | 0.688        | 0.787    | -0.002 |
| ConvNeXt V2, large               | 0.743        | <b>0.809</b> | 0.911        | 0.751        | 0.781        | 0.902        | 0.656        | 0.882        | 0.789        | 0.643        | 0.787    | -0.002 |
| MedicalNet, ResNet34             | 0.771        | 0.767        | 0.883        | 0.781        | 0.782        | 0.899        | 0.671        | 0.885        | 0.766        | 0.657        | 0.786    | -0.003 |
| ResNet-34                        | 0.763        | 0.74         | 0.895        | 0.765        | 0.791        | 0.889        | 0.643        | 0.886        | <b>0.814</b> | 0.644        | 0.783    | -0.006 |
| BarlowTwins, ResNet-50           | 0.737        | 0.749        | 0.889        | 0.749        | 0.785        | 0.886        | 0.701        | 0.875        | 0.785        | 0.674        | 0.783    | -0.006 |
| VGG-16                           | 0.743        | 0.735        | 0.918        | 0.752        | 0.768        | 0.878        | 0.657        | 0.877        | 0.801        | 0.697        | 0.783    | -0.006 |
| RadImageNet, InceptionRes-Net-V2 | 0.758        | 0.742        | 0.876        | 0.701        | 0.761        | 0.899        | 0.683        | 0.873        | 0.774        | <b>0.734</b> | 0.78     | -0.009 |
| MoCo V3, ResNet-50               | 0.764        | 0.777        | 0.897        | 0.684        | 0.768        | 0.906        | 0.679        | 0.879        | 0.81         | 0.635        | 0.78     | -0.009 |
| DenseNet-161                     | 0.78         | 0.735        | 0.909        | 0.697        | 0.795        | 0.89         | 0.669        | 0.884        | 0.803        | 0.631        | 0.779    | -0.01  |
| RadImageNet, DenseNet-121        | 0.745        | 0.784        | 0.866        | 0.749        | 0.784        | 0.899        | 0.664        | 0.874        | 0.764        | 0.662        | 0.779    | -0.01  |
| MedicalNet, ResNet-18            | 0.744        | 0.748        | 0.882        | 0.748        | 0.758        | 0.899        | 0.671        | 0.881        | 0.761        | 0.681        | 0.777    | -0.012 |
| MedicalNet, ResNet-50            | 0.739        | 0.725        | 0.866        | 0.747        | 0.775        | 0.897        | 0.619        | 0.876        | 0.795        | 0.712        | 0.775    | -0.014 |
| RadImageNet, Inception-V3        | 0.741        | 0.749        | 0.874        | 0.742        | 0.757        | 0.899        | 0.644        | 0.873        | 0.738        | 0.675        | 0.769    | -0.02  |

ΔAUC denotes the mean difference to the standard “Hand-crafted, 3-D, All” model. Models with the highest AUC for each dataset were marked in bold.
